# Supplementary material
Source: Springer Nature journal article supplement (https://www.springermedizin.de/resource/supplementary/12865_2010_314_MOESM4_ESM.pdf/9427732)

**A**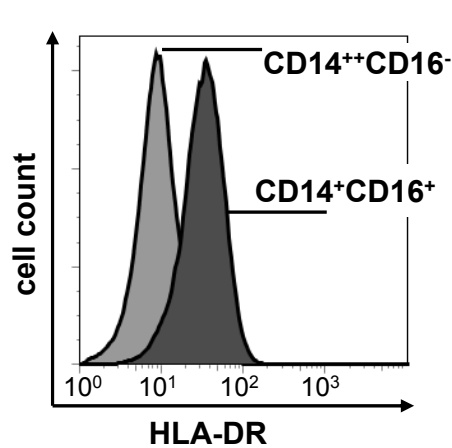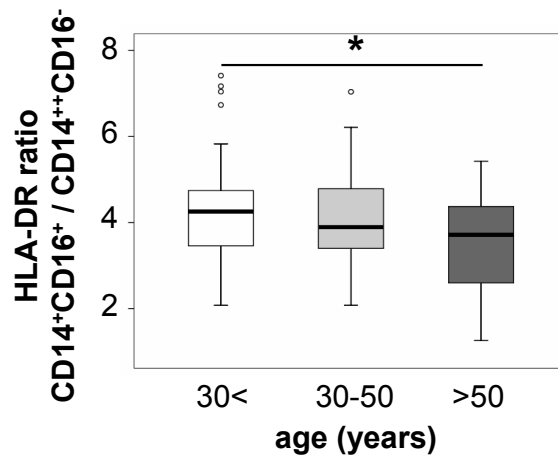**B**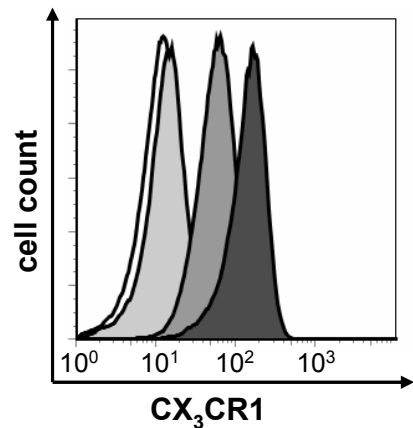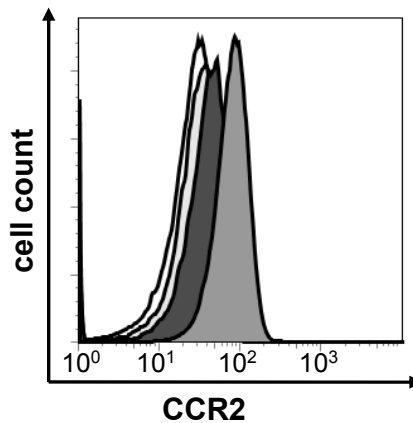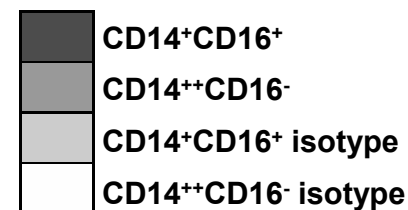**C**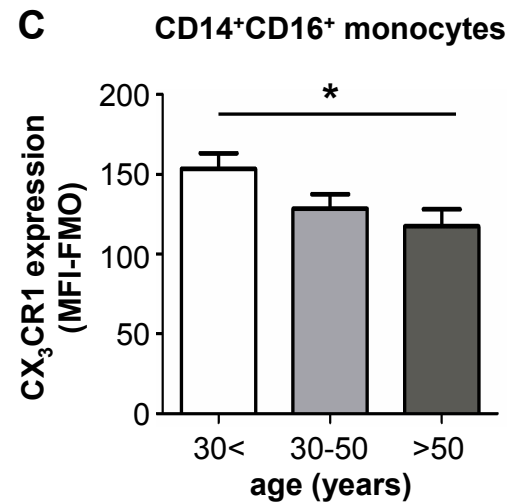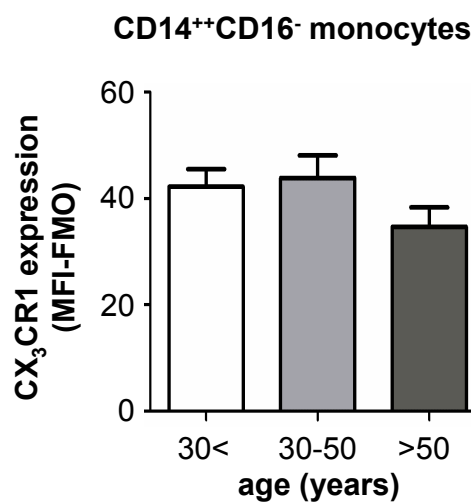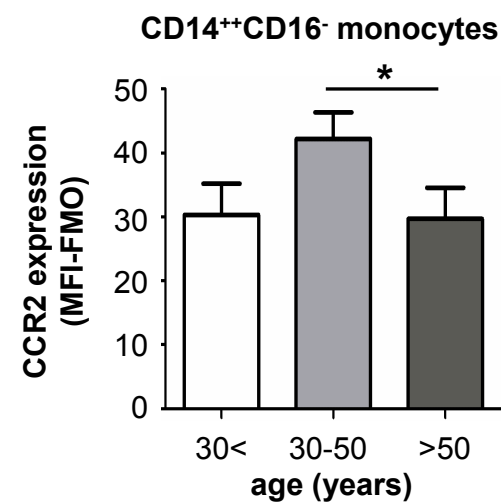

Supplement: MOESM4 [file 9427732]
